# Supplementary material
Source: MDPI journal article supplement (https://www.mdpi.com/1999-4907/9/10/646)
Supplement: s1 [file s1]

-  Genetic barrier with bootstrap support >20%
-  Genetic barrier with bootstrap support 10%-20%
-  Genetic barrier with bootstrap support <10%
-  Population location
-  Delaunay triangulation

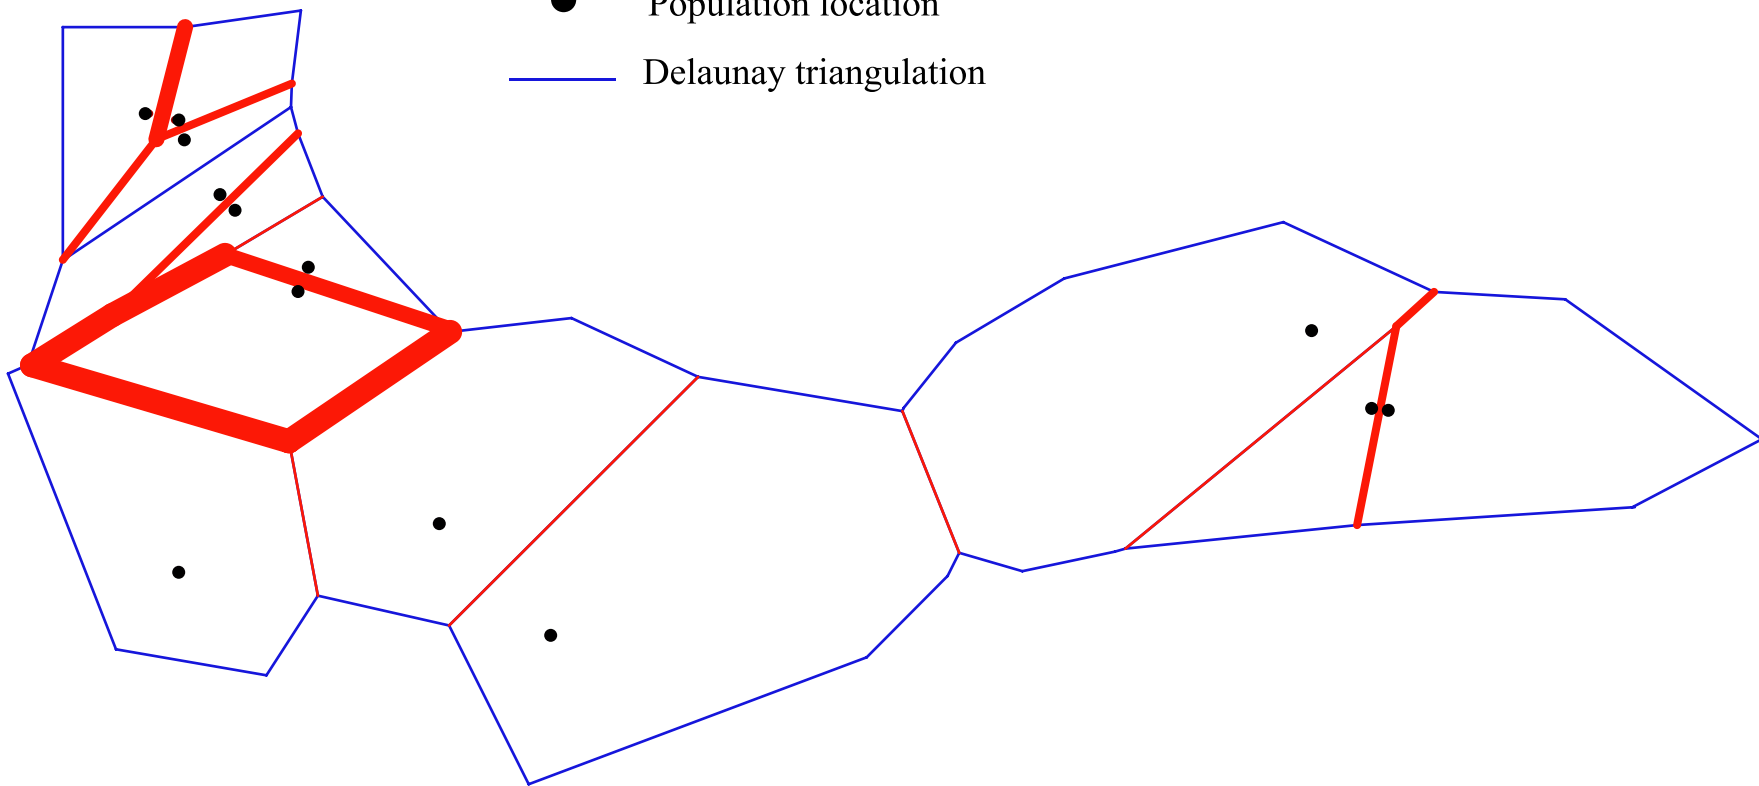

*Juglans sigillata*
