# Supplementary material
Source: MDPI journal article supplement (https://www.mdpi.com/1999-4907/9/10/646)

# Detection of loci under selection selection from genome scans based on F<sub>ST</sub>

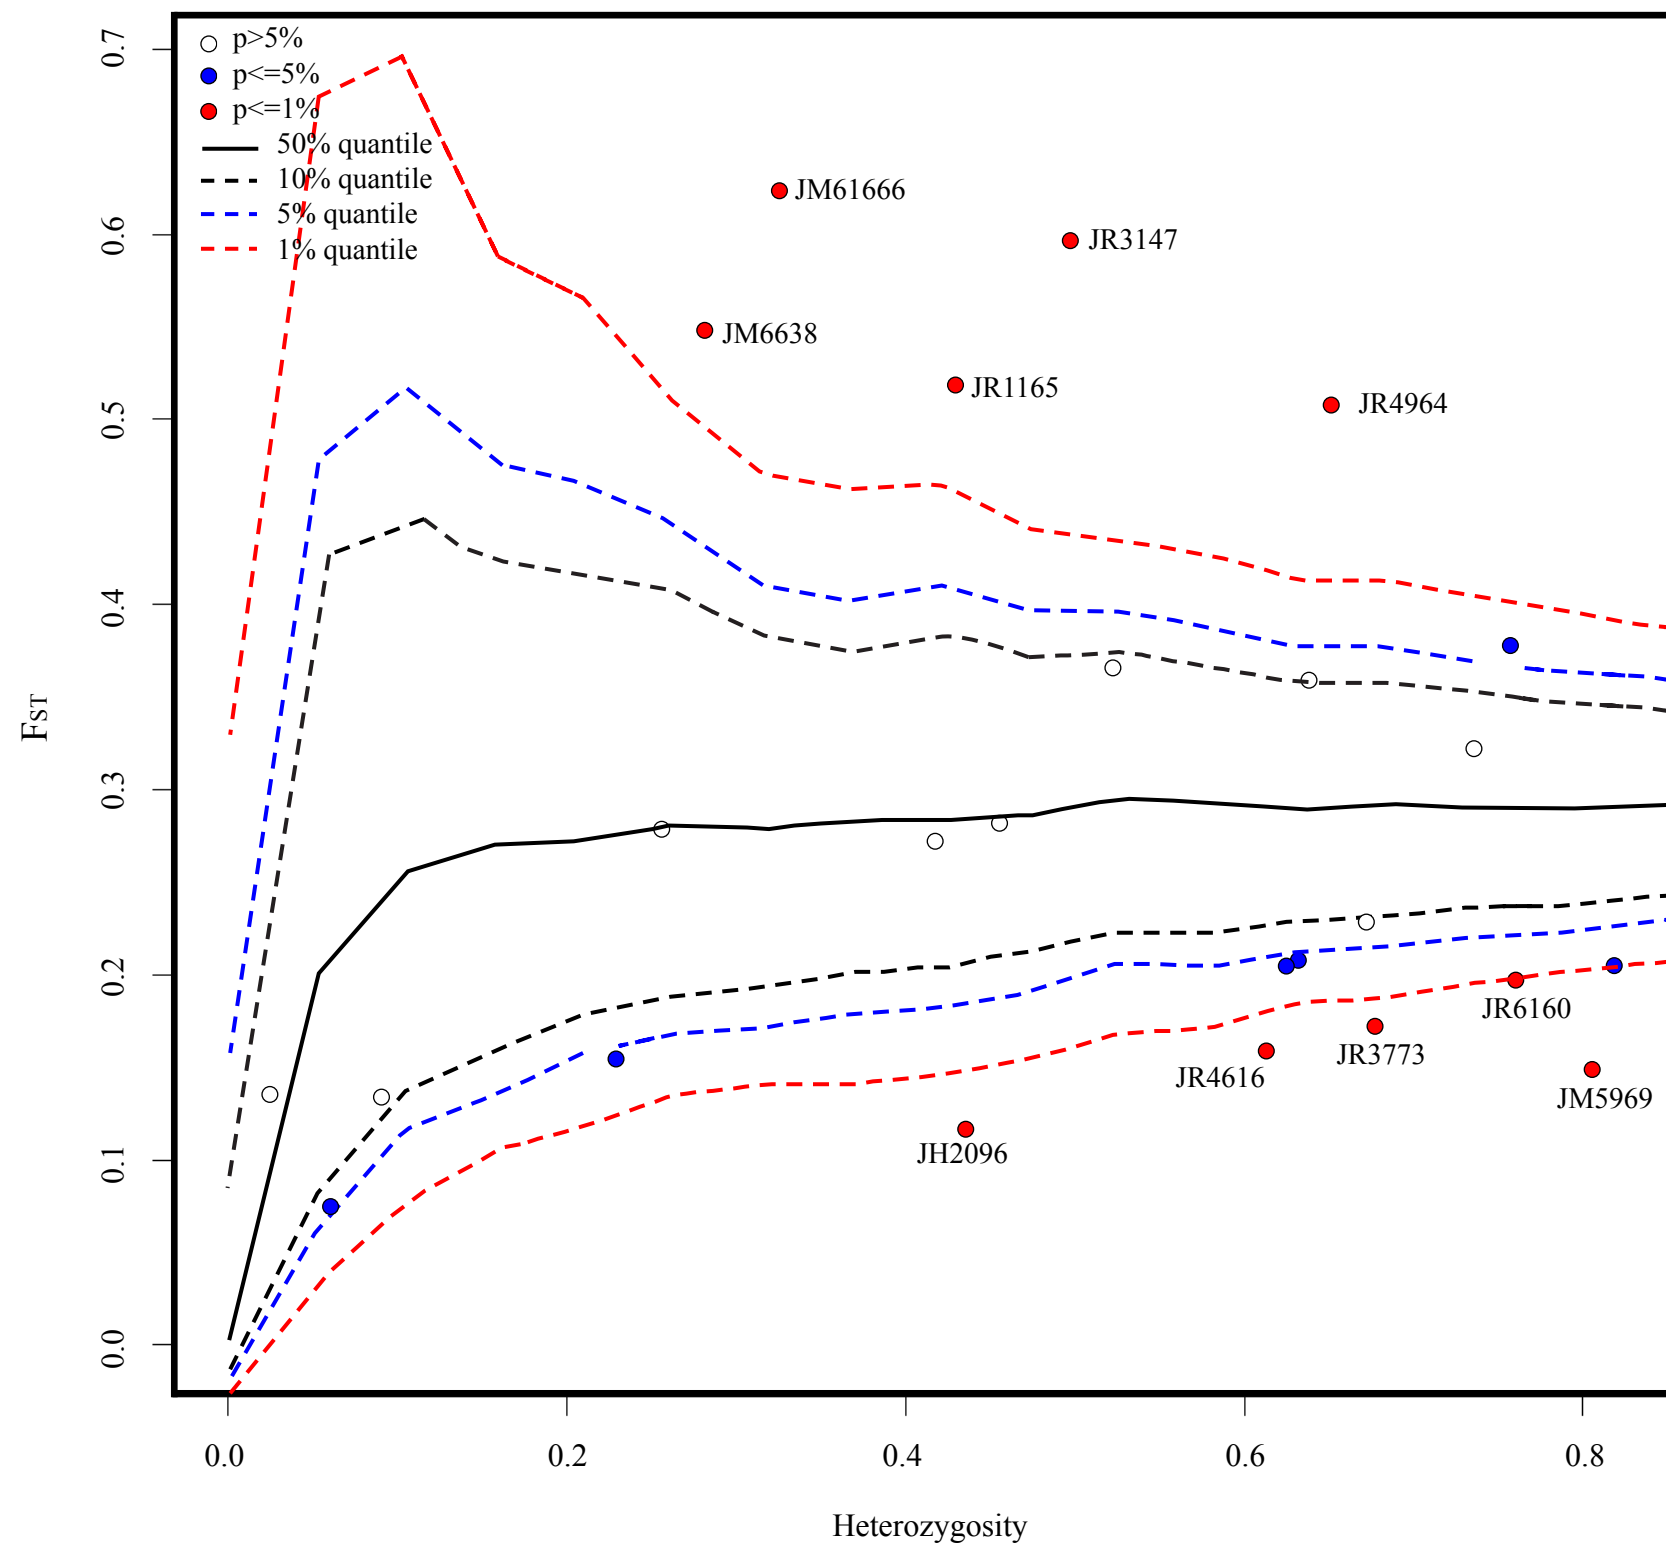

Supplement: s1 [file s1]

**(a)**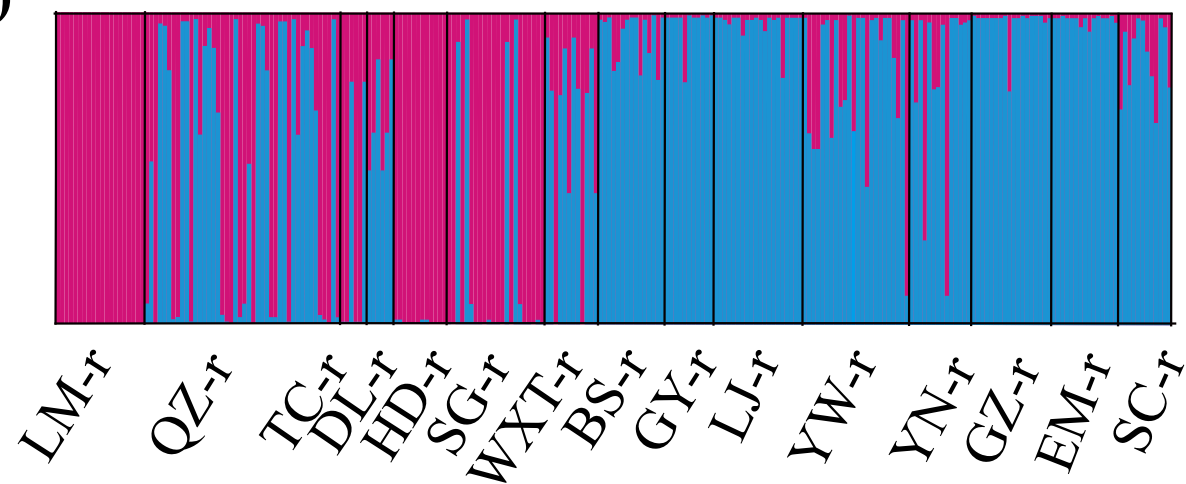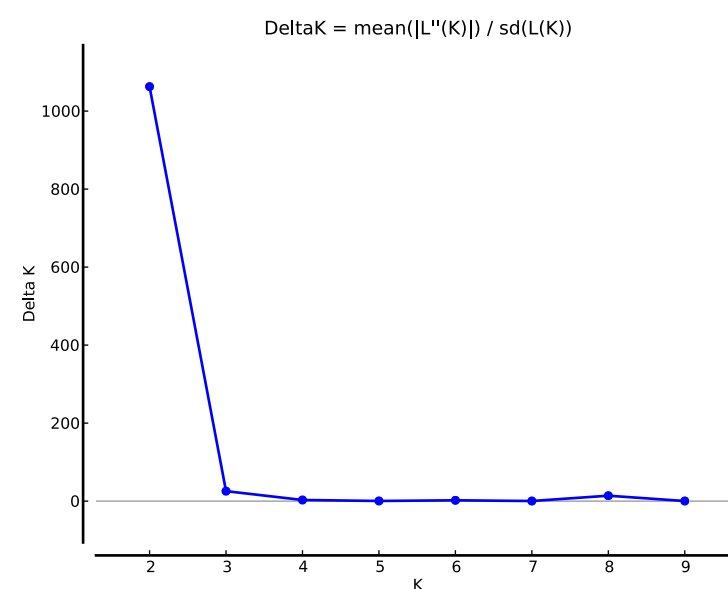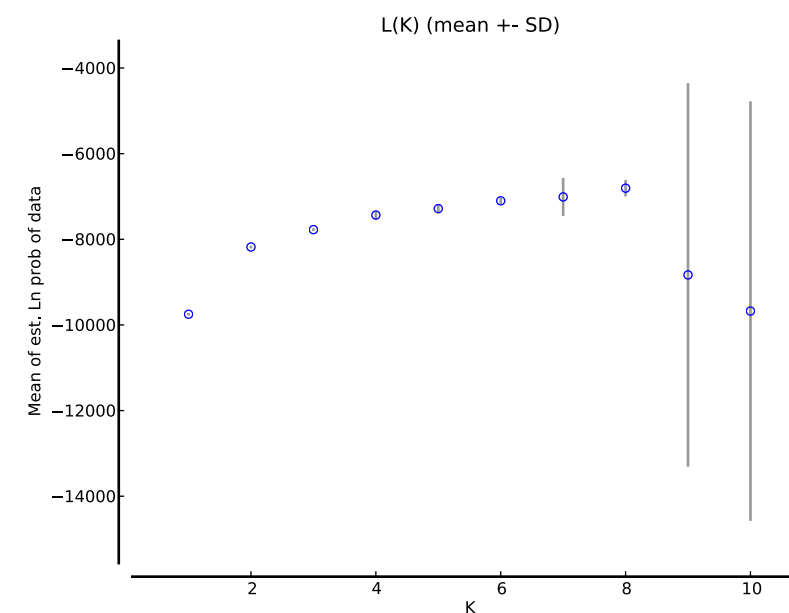**(b)**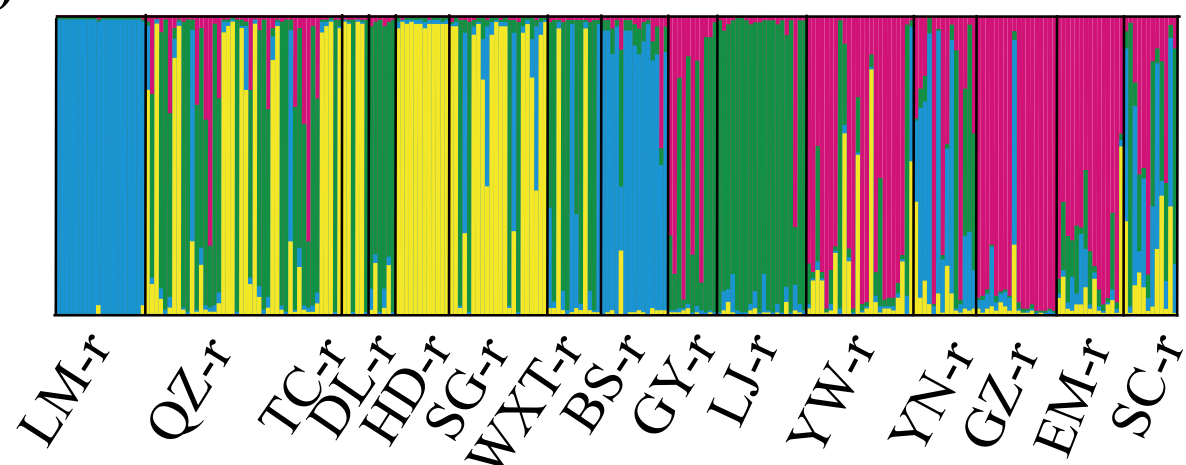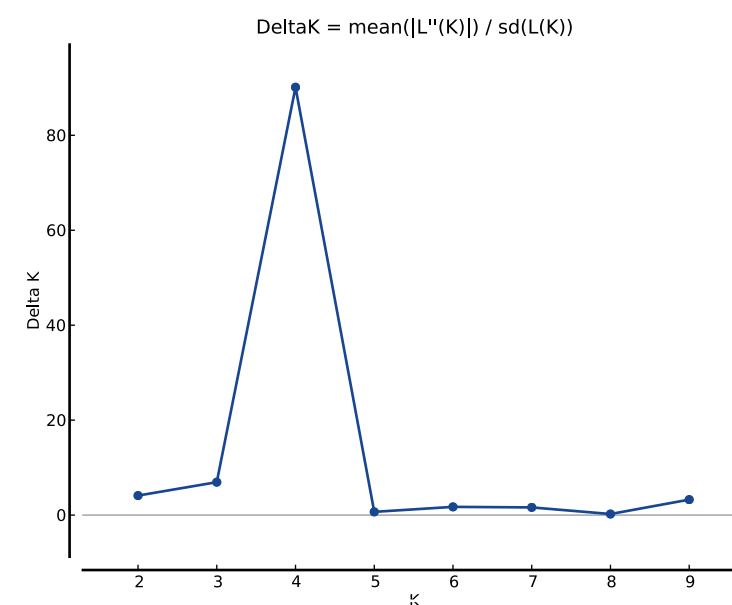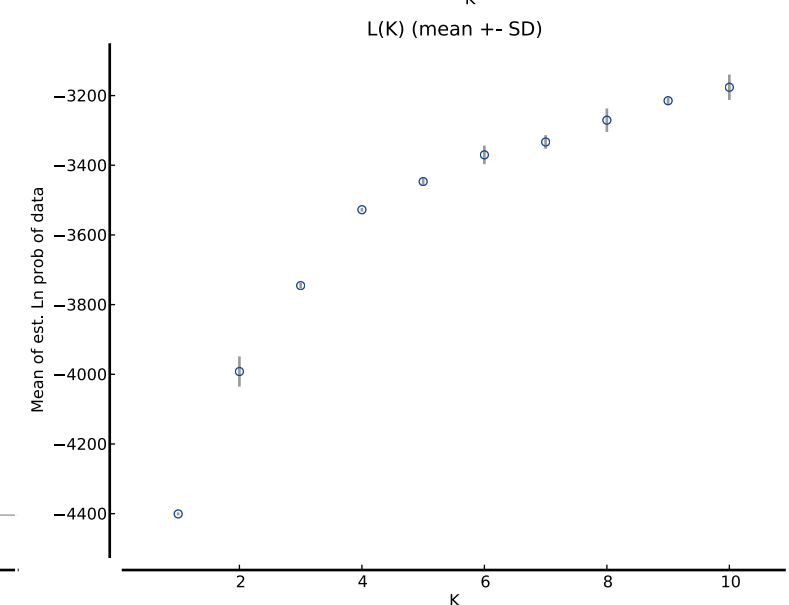**(c)**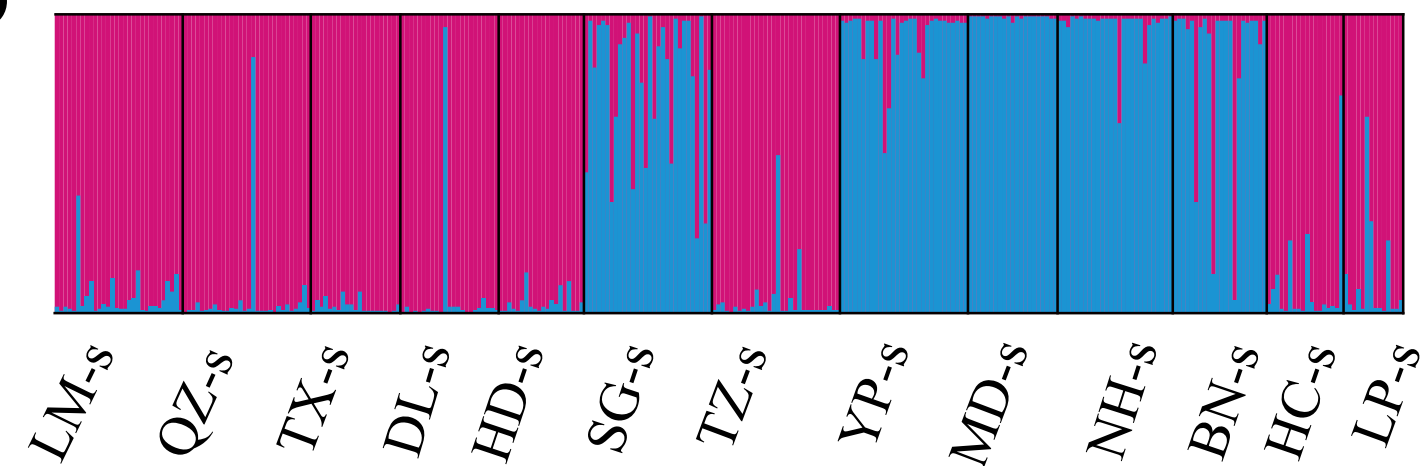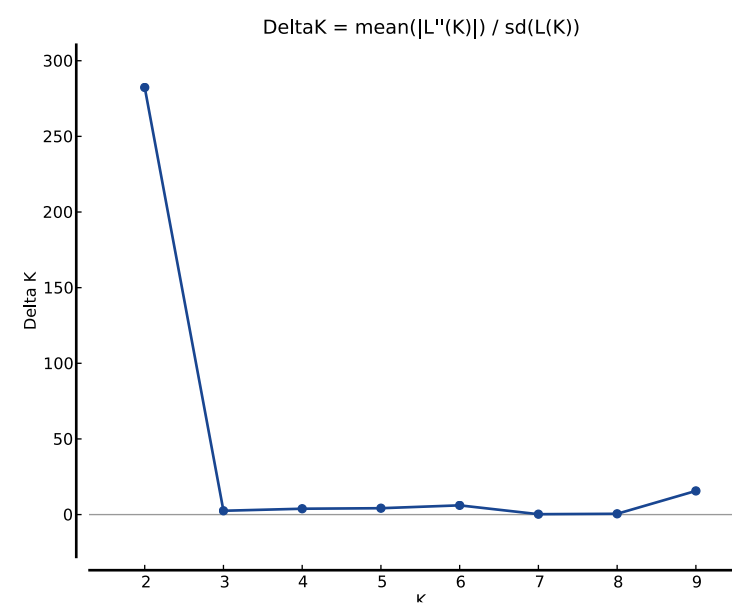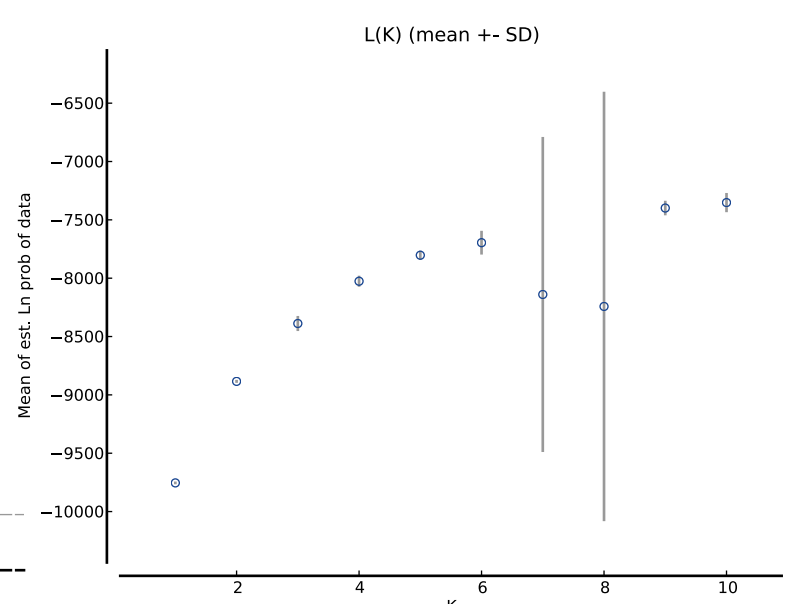**(d)**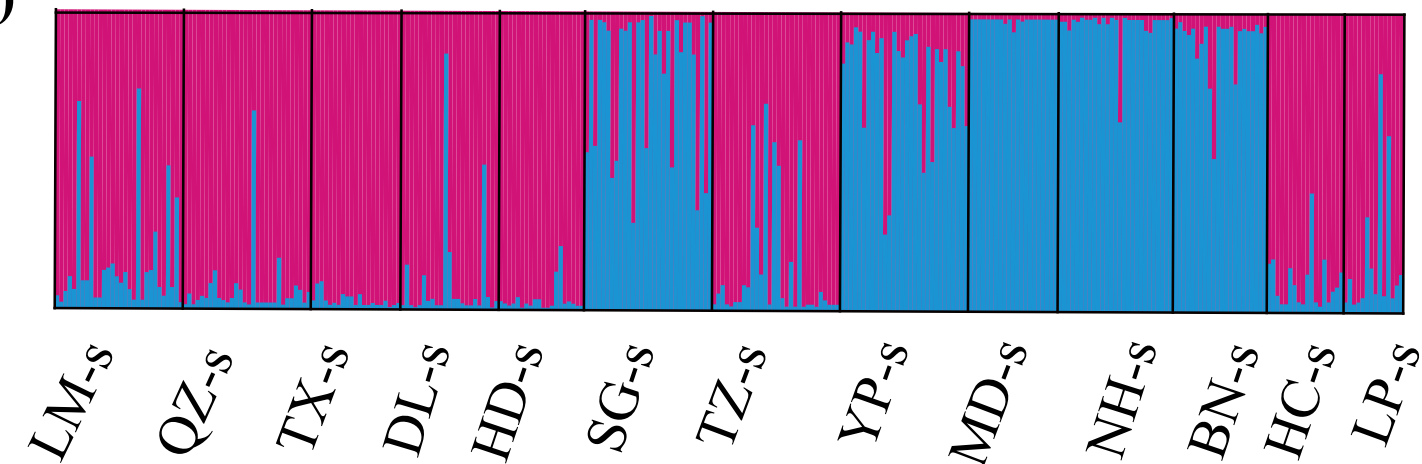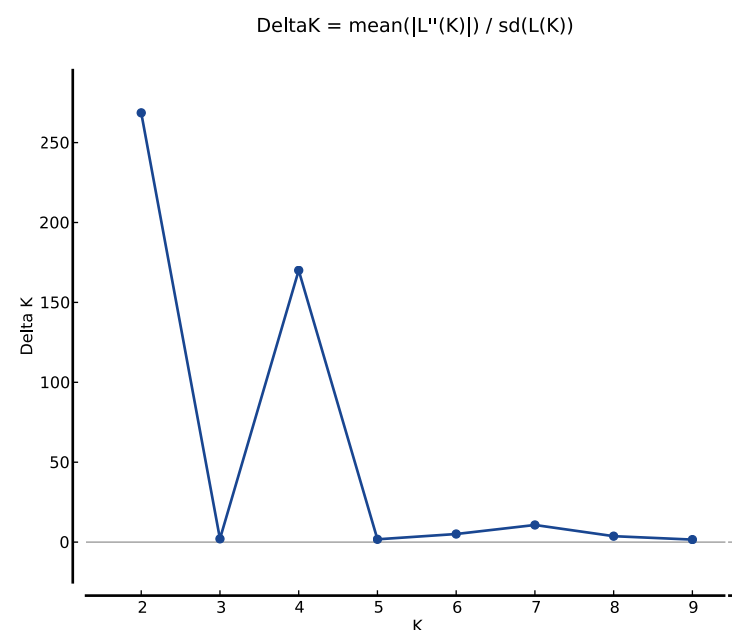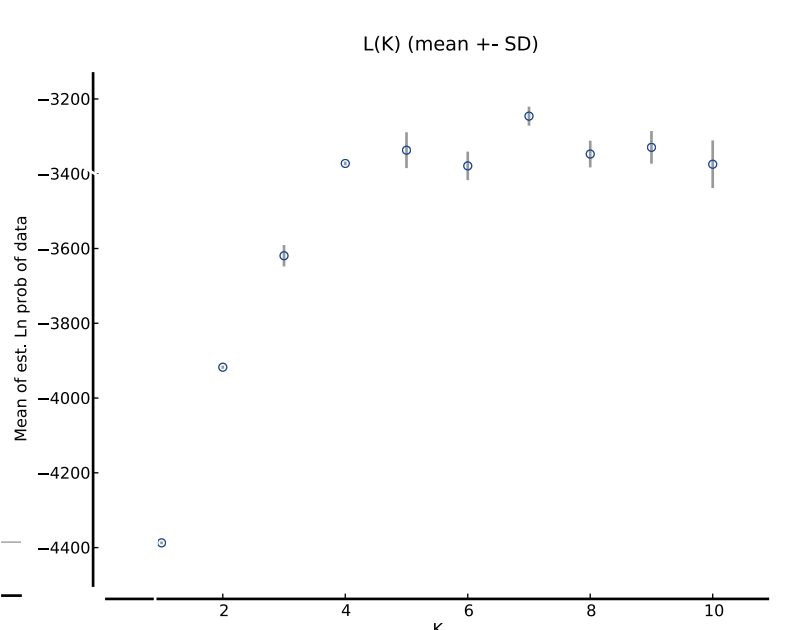

Supplement: s1 [file s1]

(a)

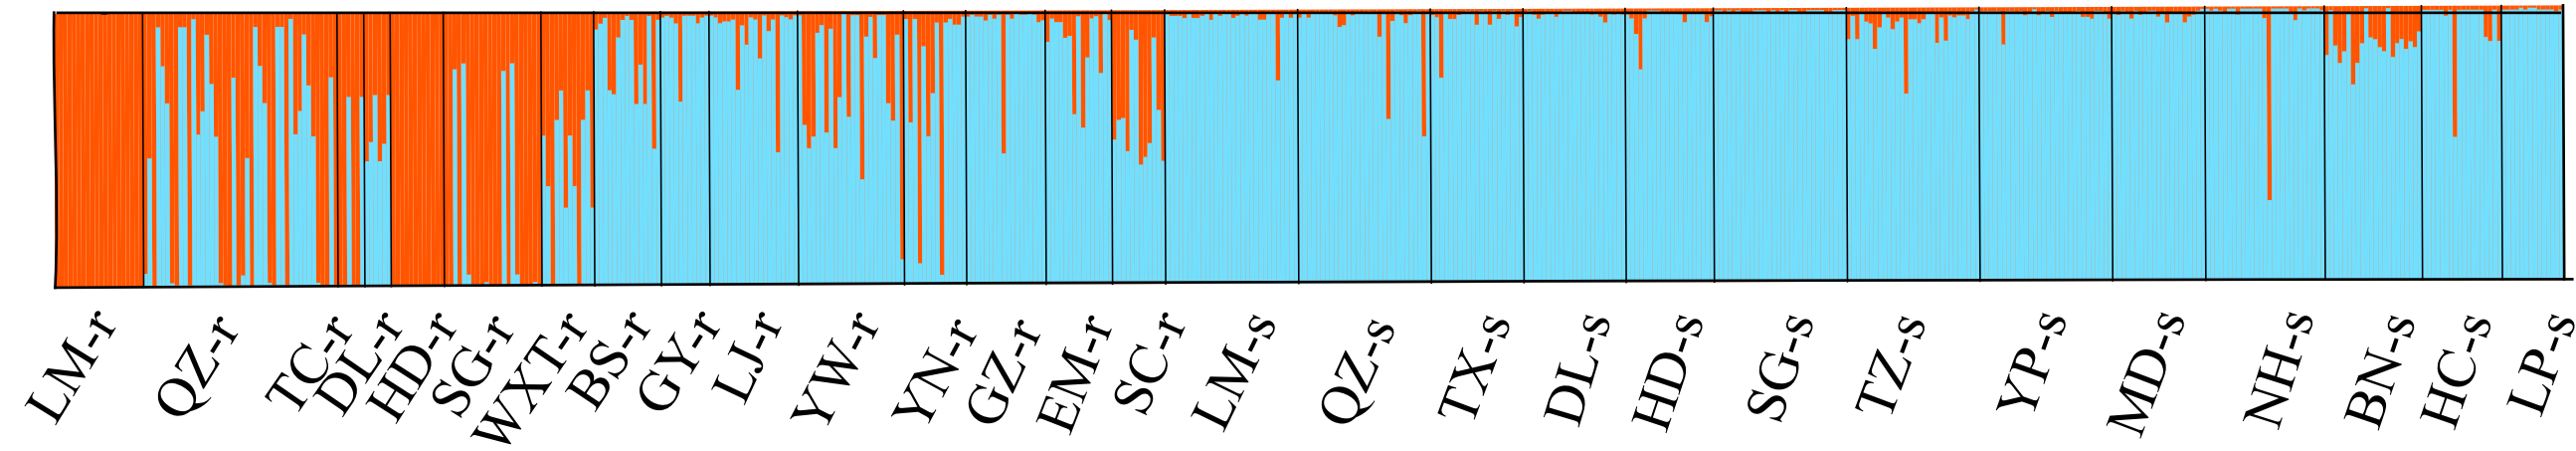

(b)

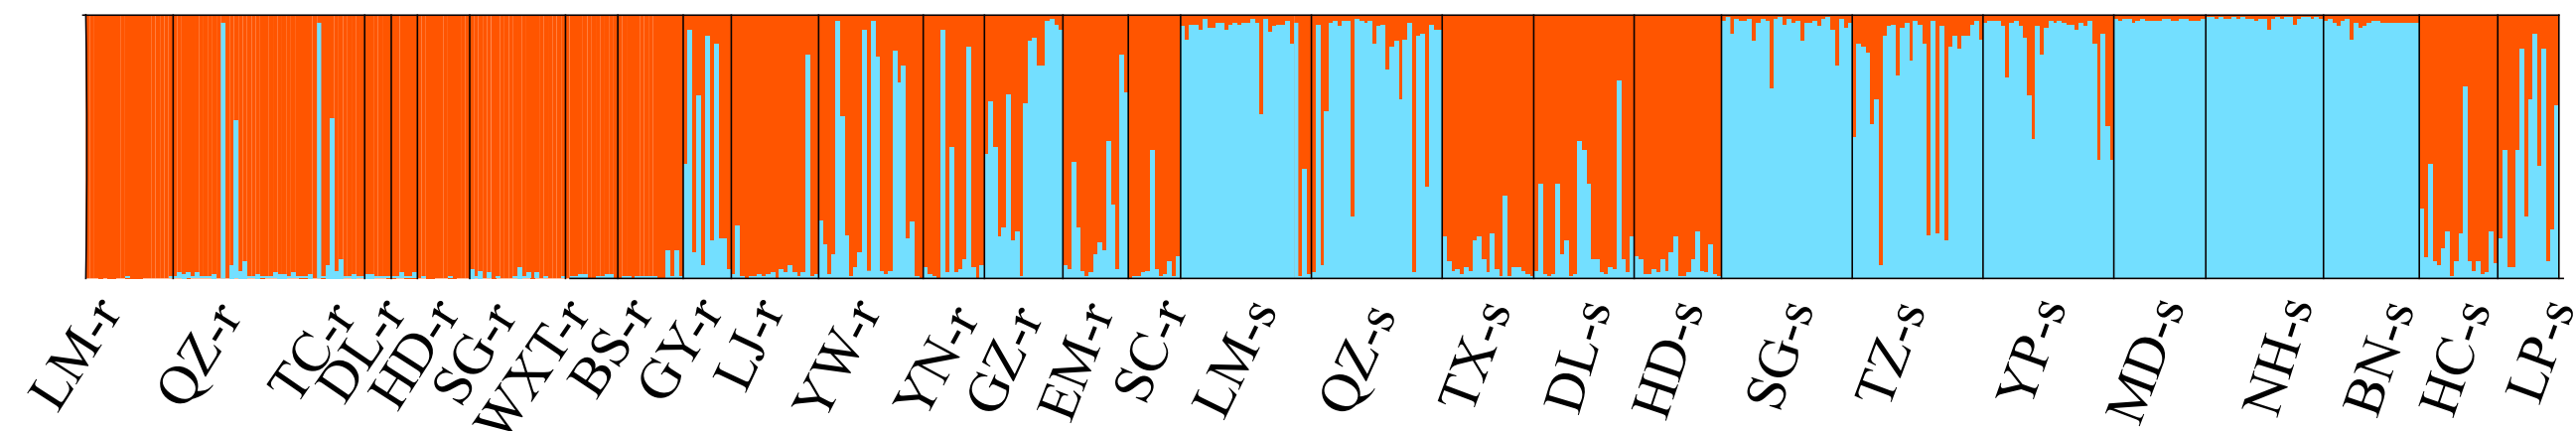

(c)

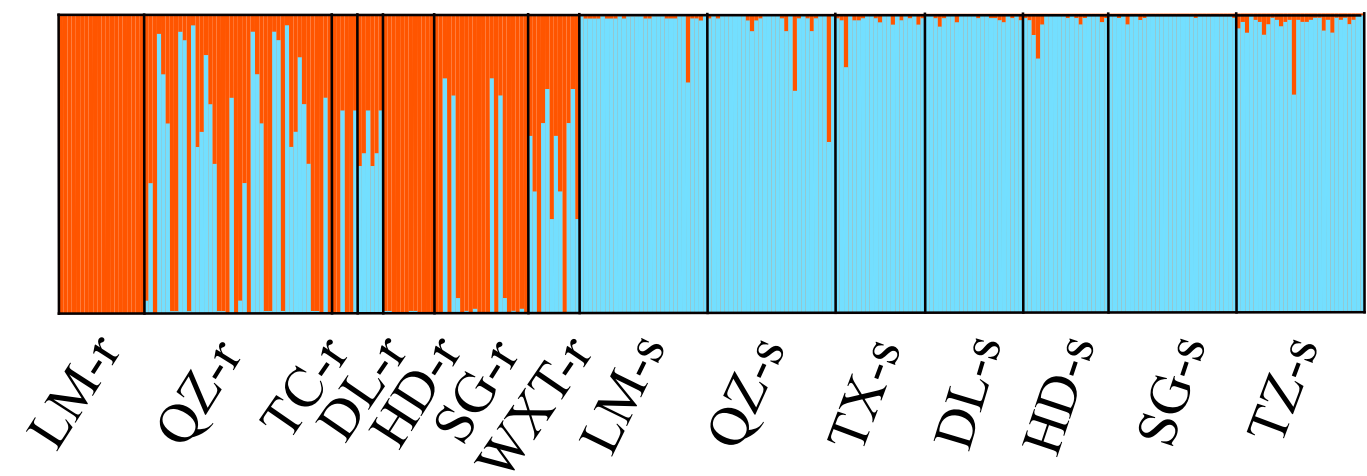

(d)

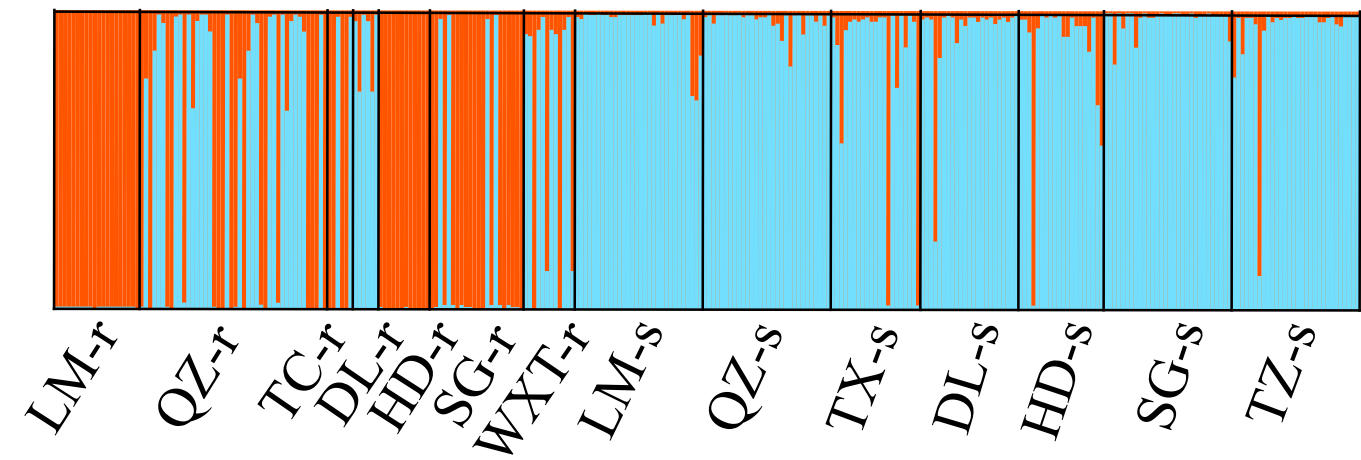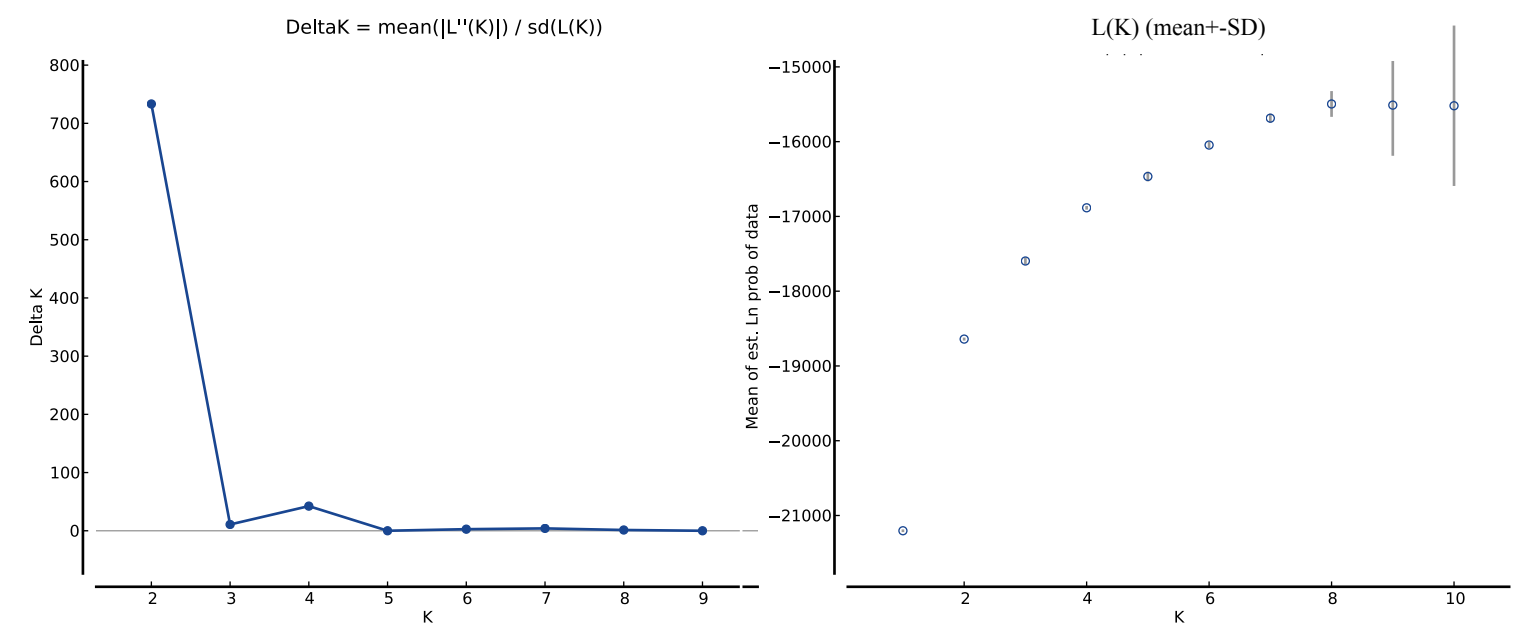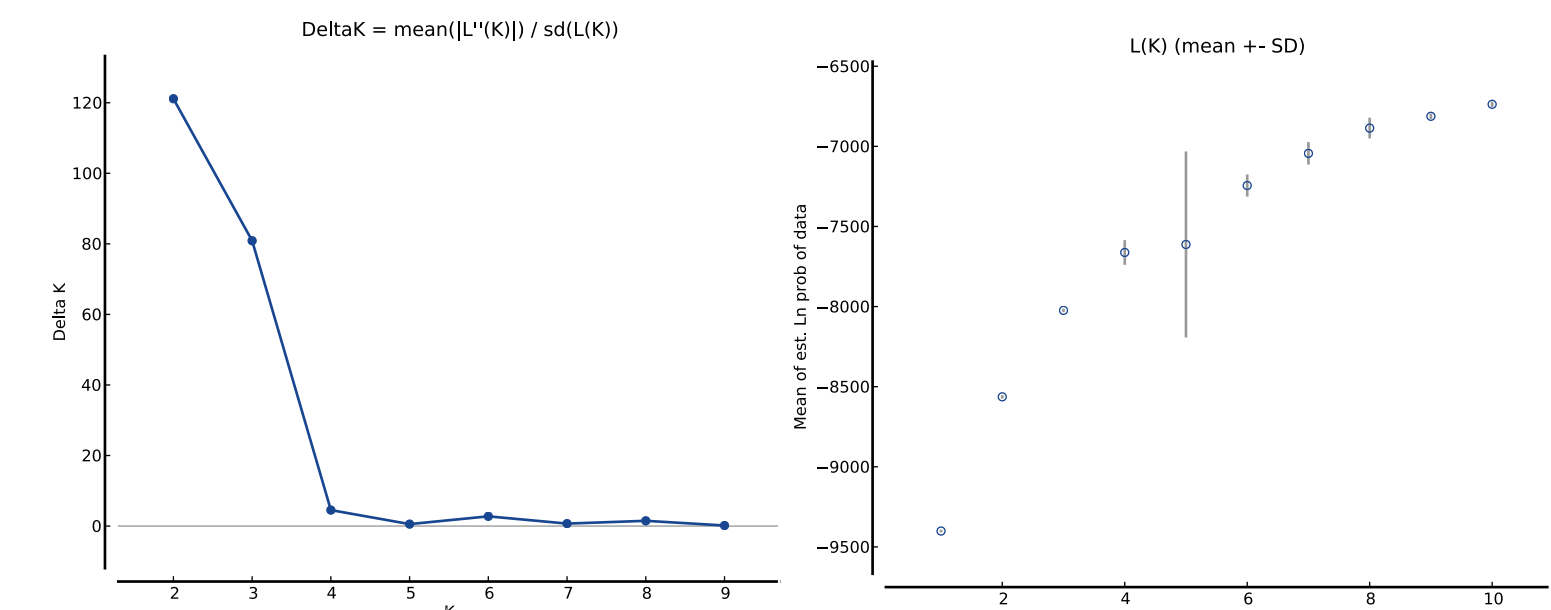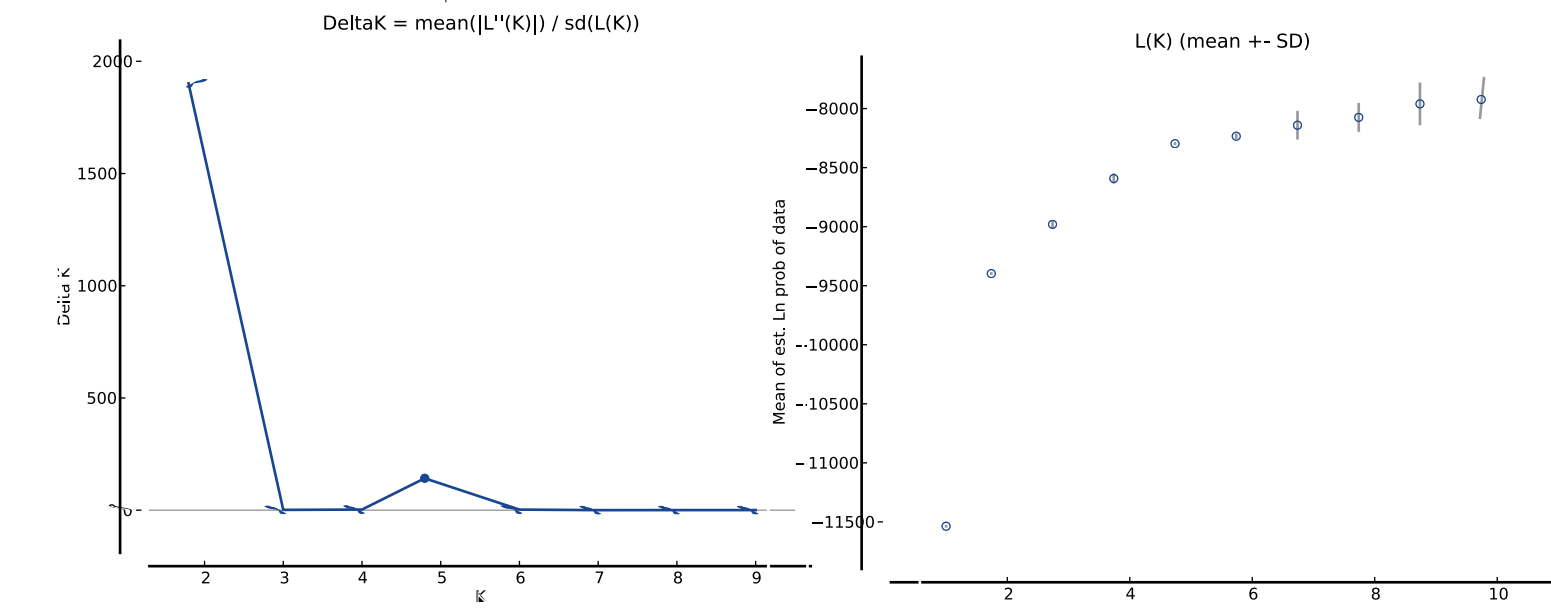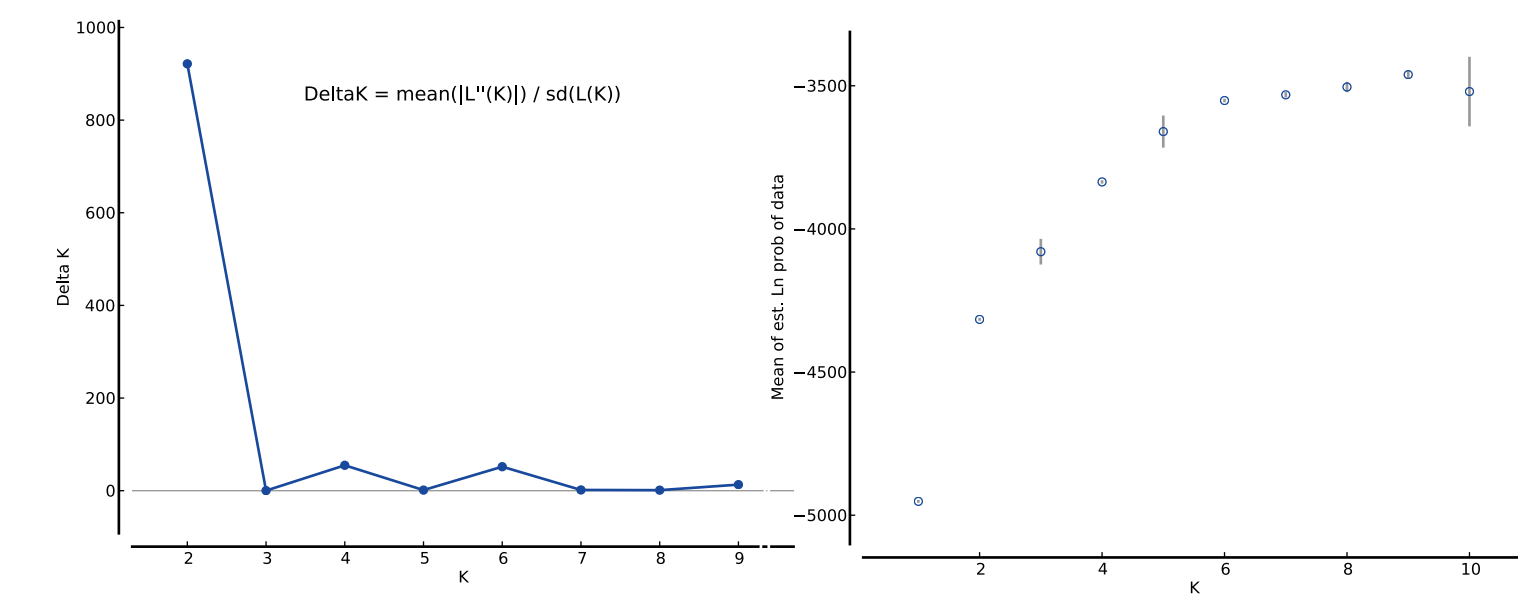

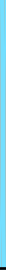

Supplement: s1 [file s1]

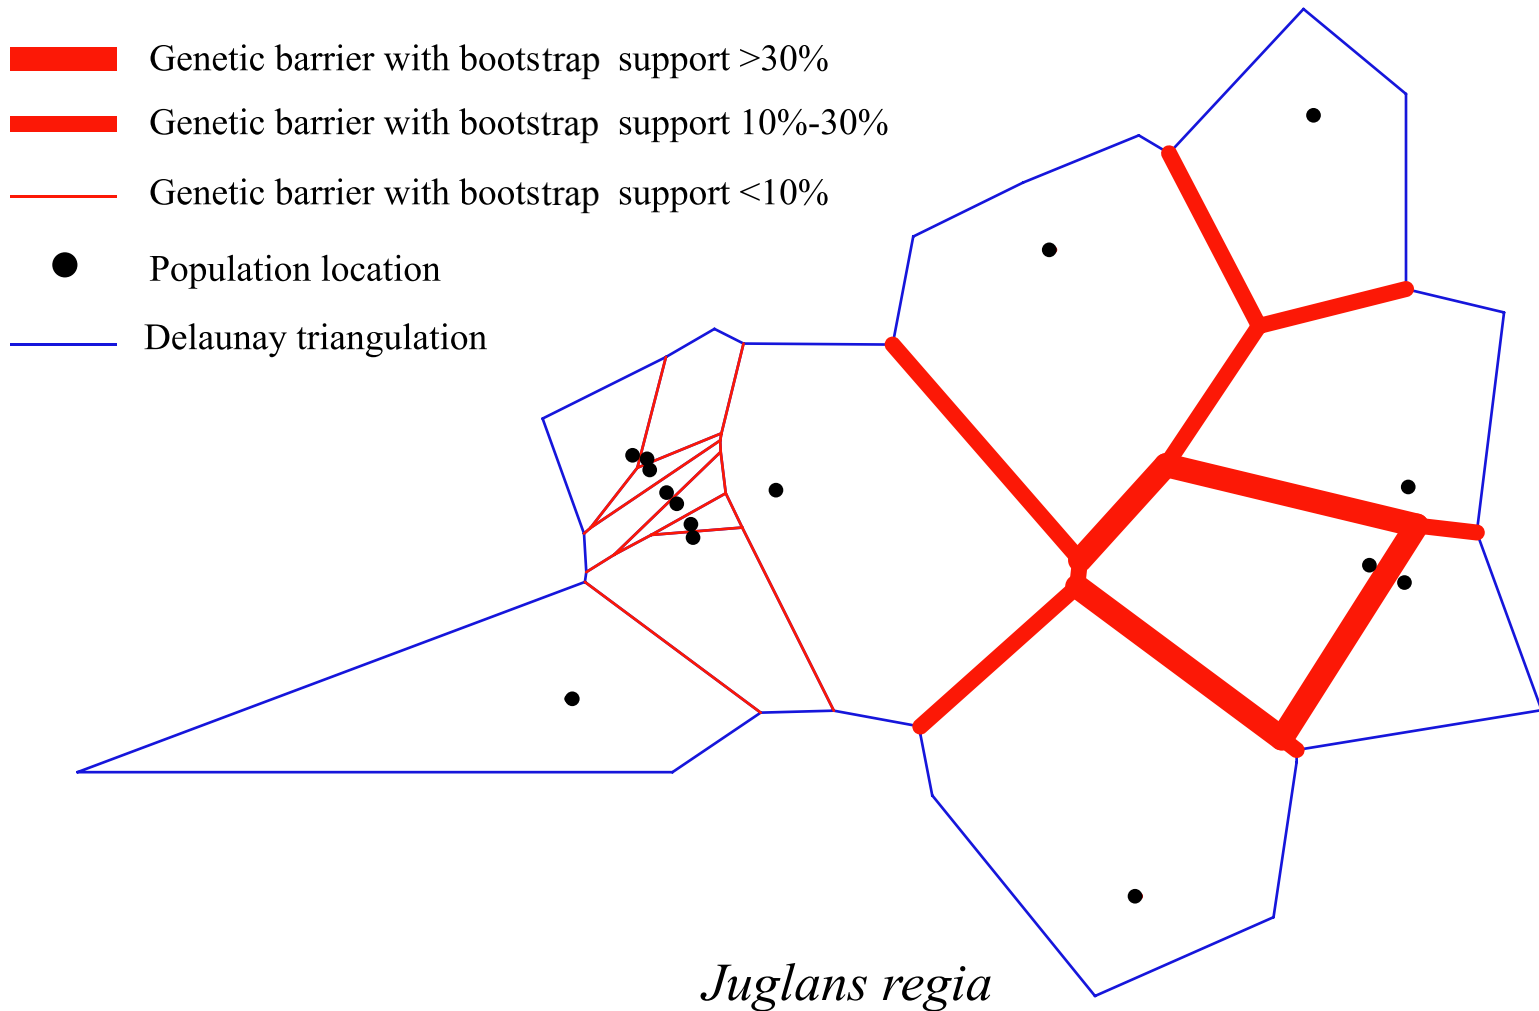

Supplement: s1 [file s1]

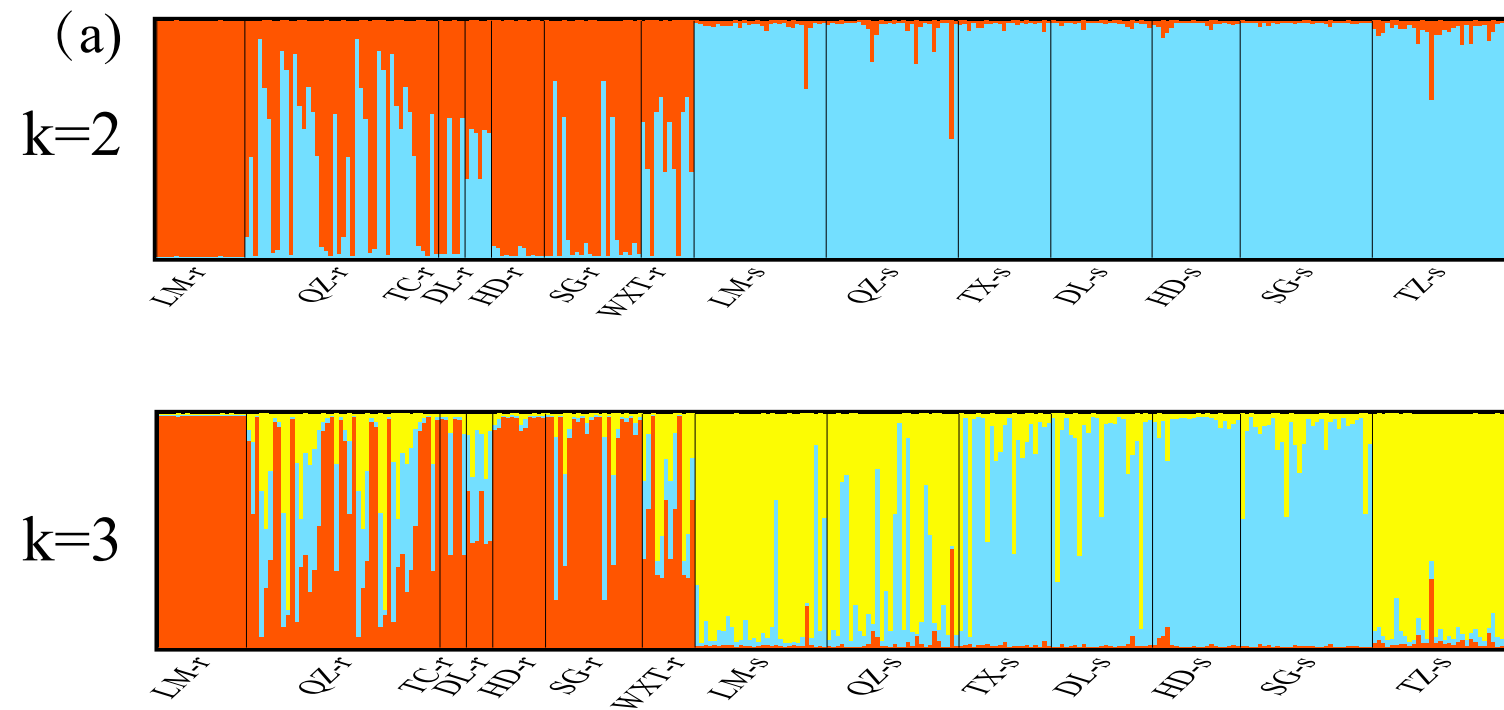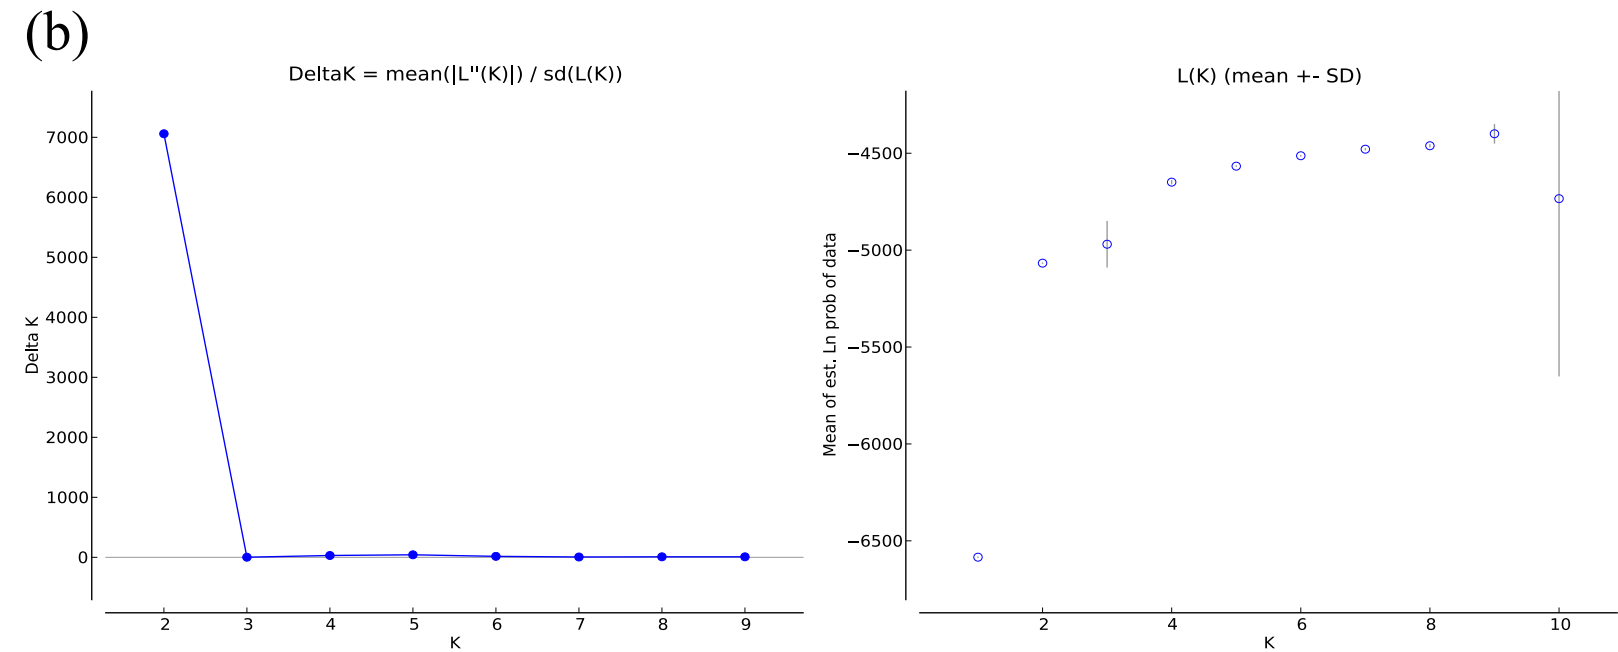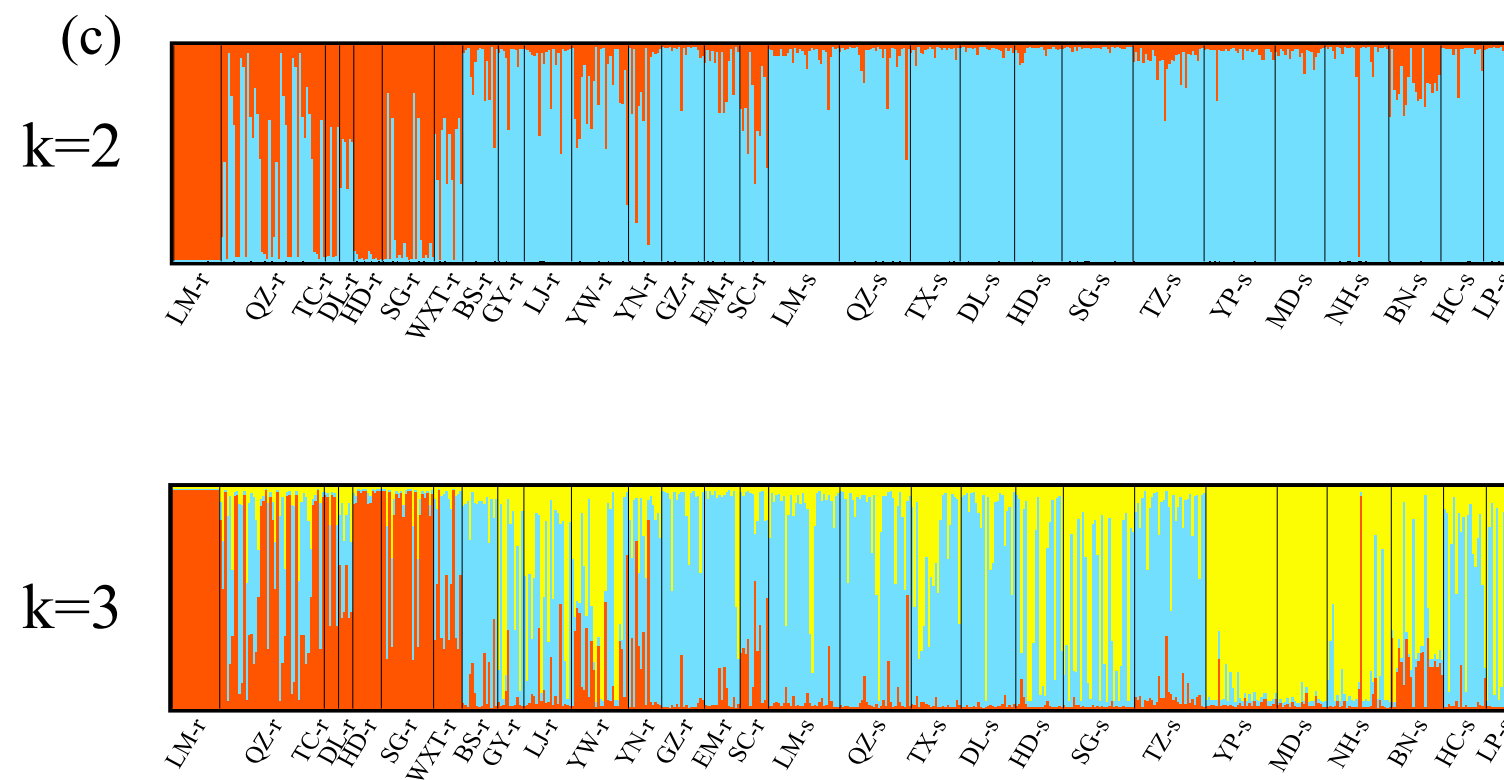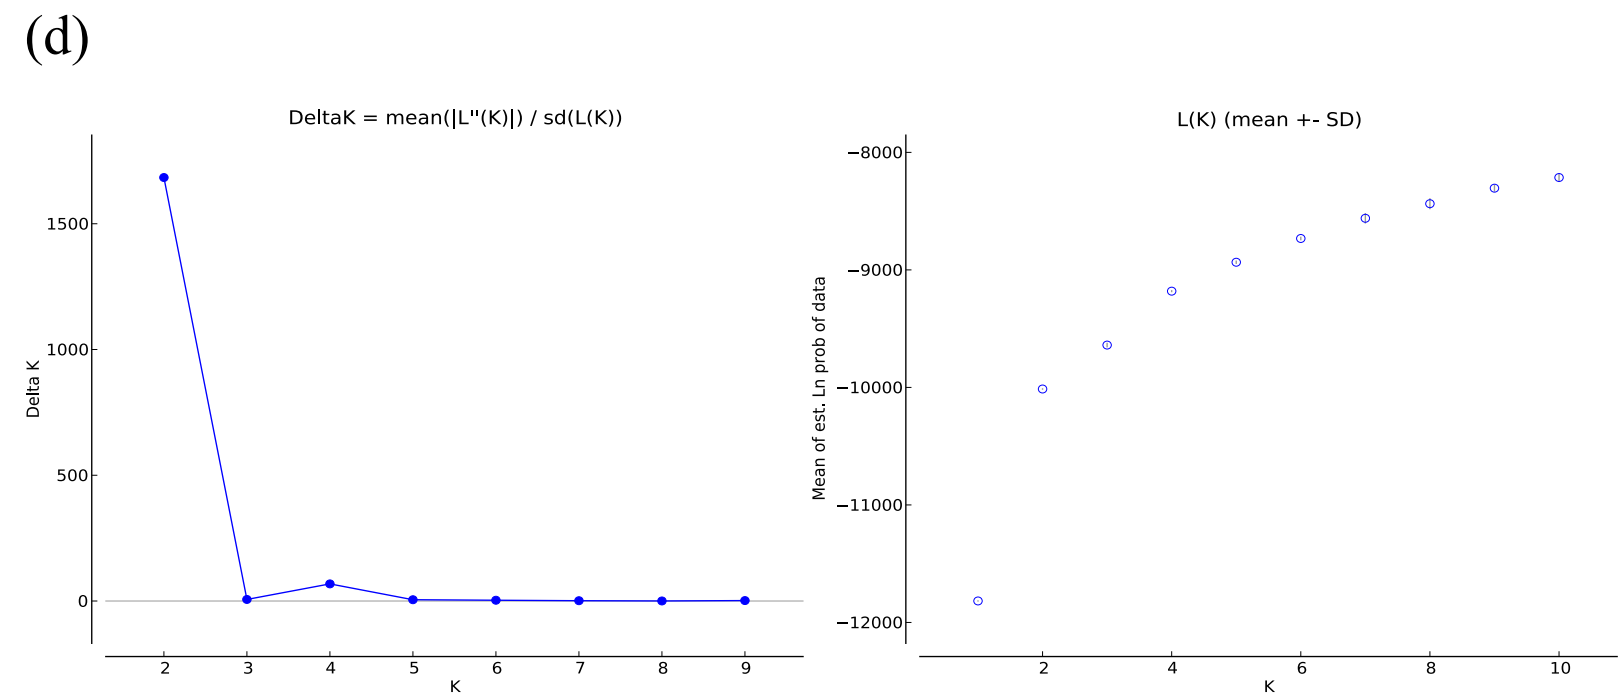

Supplement: s1 [file s1]

(a)

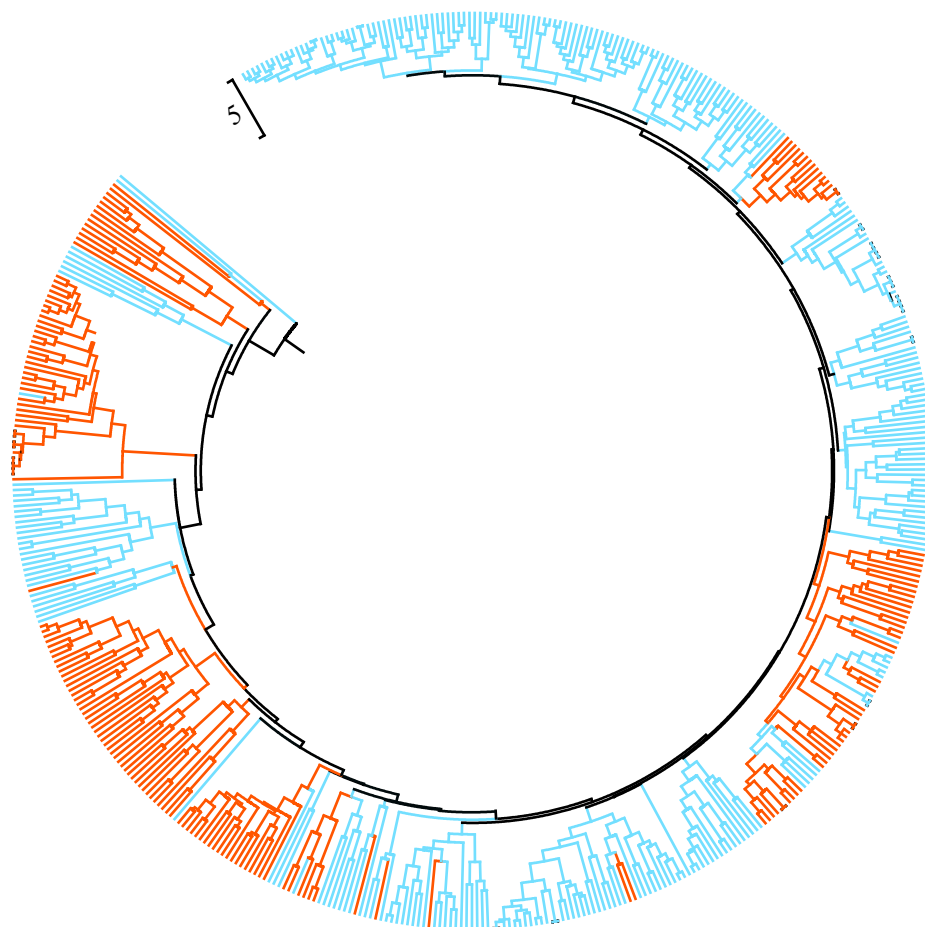

(b)

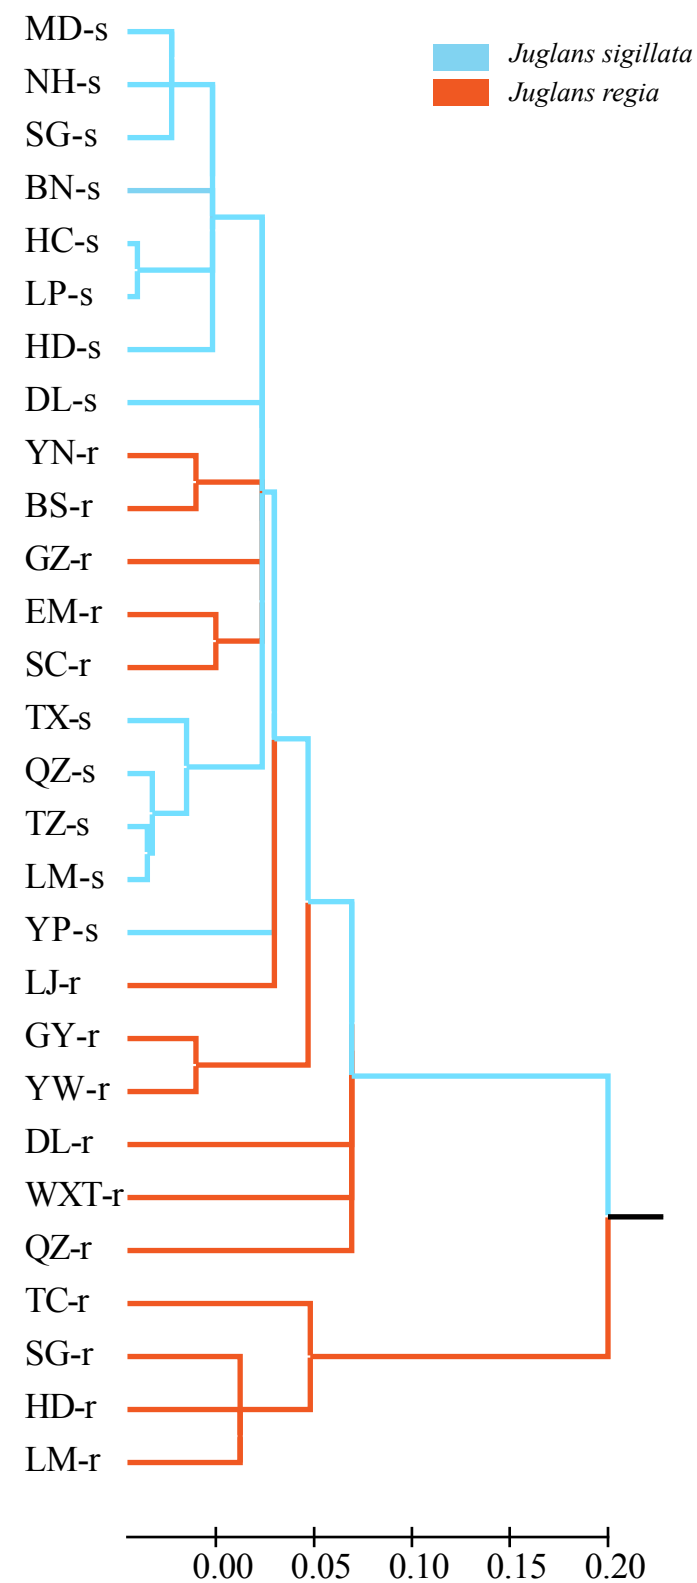

(c)

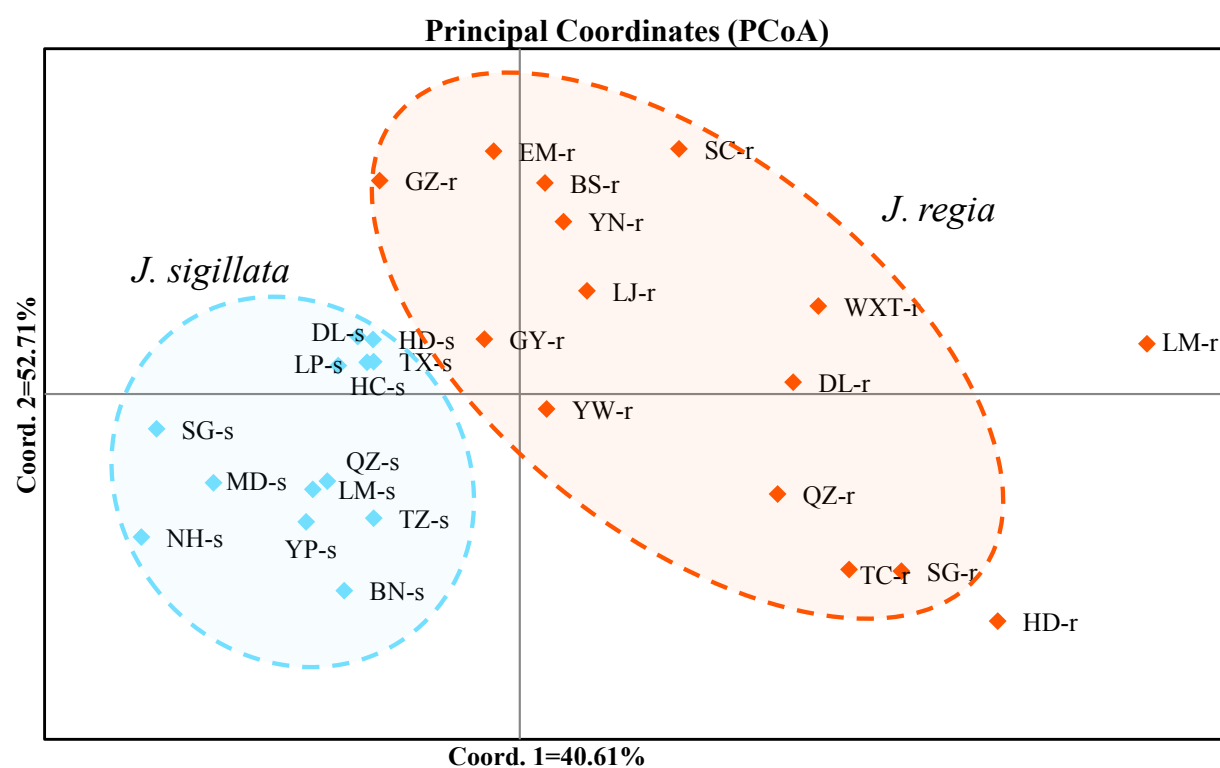

Supplement: s1 [file s1]
